# Supplementary material
Source: PubMed Central journal article supplement (PMC3175558)
Supplement: supp_45_2_287__2.pdf [file supp_45_2_287__2.pdf]

**Table S1 Primers used for the cloning of 3'UTR reporters**

| <b>3'UTR</b>   | <b>Forward Primer</b>        | <b>Reverse Primer</b>        |
|----------------|------------------------------|------------------------------|
| ITGA11         | GAATGGAAGCTCAAGCTGGTT        | TCTGTTTTGTCTTGGATCCTT        |
| NID1           | CCTCAGACAGACTTATACACC        | CTGCTCATTATCATCCACCAA        |
| ADAM12         | CAACAGTGAAGACAGAAGTT         | ACAACAAGCCTTCCTGCCAT         |
| ADAMTS9        | GATTCTATTATGACTGCCTT         | GTCTTATTCATCCAAGTGATT        |
| ITGA11 mutant  | CTACTAATAGGCACGGAATTCGTAA    | TTACGAATTCGGTGCCTATTAGTAG    |
| NID1 mutant    | ATGTTTTGTTTACGTAGGCTGAATT    | AATTCAGCCTACGTAAACAAAACAT    |
| ADAM12 mutant  | GTGCTGTGCTACATTGAGCTGTCTACTT | AAGTAGACAGCTCAATGTAGCACAGCAC |
| ADAMTS9 mutant | CCATCATCAATATGACGTAAGAGTTGT  | ACAACCTCITACGTCATATTGATGATGG |

**Table S2. miRNAs differentially expressed in bleomycin-treated lungs**

| <i>Name of miRNAs</i> | <i>FC(Bleo-D10/CTRL)</i> | <i>P-value Bleo-(D10/CTRL)</i> | <i>FC(Bleo-D28/CTRL)</i> | <i>P-value (Bleo-D28/CTRL)</i> |
|-----------------------|--------------------------|--------------------------------|--------------------------|--------------------------------|
| mmu-miR-872_st        | 0.15                     | 3.00E-05                       | 0.42                     | 1.32E-01                       |
| mmu-miR-374_st        | 0.18                     | 2.16E-02                       | 0.32                     | 1.00E-01                       |
| mmu-miR-451_st        | 0.19                     | 3.05E-02                       | 0.19                     | 2.71E-02                       |
| mmu-miR-19a_st        | 0.23                     | 4.53E-03                       | 0.23                     | 6.91E-02                       |
| mmu-miR-26b_st        | 0.25                     | 2.65E-03                       | 0.22                     | 7.15E-02                       |
| mmu-miR-466h_st       | 0.28                     | 1.24E-01                       | 0.16                     | 4.60E-02                       |
| mmu-miR-669c_st       | 0.33                     | 8.60E-02                       | 0.27                     | 2.14E-03                       |
| mmu-miR-669d_st       | 0.35                     | 3.83E-02                       | 0.15                     | 3.81E-03                       |
| mmu-miR-297a_st       | 0.37                     | 3.20E-01                       | 0.07                     | 3.01E-02                       |
| mmu-miR-466g_st       | 0.38                     | 1.72E-01                       | 0.04                     | 1.94E-03                       |
| mmu-let-7f_st         | 0.38                     | 4.60E-02                       | 0.54                     | 5.66E-02                       |
| mmu-miR-466f-3p_st    | 0.40                     | 2.37E-01                       | 0.07                     | 5.83E-03                       |
| mmu-miR-669e_st       | 0.41                     | 1.79E-01                       | 0.13                     | 5.09E-03                       |
| mmu-miR-466j_st       | 0.42                     | 1.86E-01                       | 0.19                     | 2.90E-02                       |
| mmu-miR-29c_st        | 0.43                     | 5.78E-02                       | 0.30                     | 1.57E-02                       |
| mmu-let-7d-star_st    | 0.44                     | 1.62E-01                       | 0.21                     | 9.96E-03                       |
| mmu-let-7g_st         | 0.44                     | 9.38E-02                       | 0.18                     | 5.39E-03                       |
| mmu-miR-466f_st       | 0.45                     | 2.62E-01                       | 0.13                     | 2.34E-02                       |
| mmu-miR-503-star_st   | 0.47                     | 1.17E-01                       | 0.39                     | 4.76E-02                       |
| mmu-miR-346_st        | 0.48                     | 1.79E-01                       | 0.36                     | 2.74E-02                       |
| mmu-miR-322_st        | 0.50                     | 1.55E-01                       | 0.37                     | 3.17E-02                       |
| mmu-miR-30e-star_st   | 0.54                     | 1.17E-02                       | 0.45                     | 4.91E-02                       |
| mmu-miR-1187_st       | 0.55                     | 2.66E-01                       | 0.13                     | 5.96E-03                       |
| mmu-miR-340-5p_st     | 0.81                     | 4.12E-01                       | 0.43                     | 1.49E-02                       |
| mmu-miR-200c-star_st  | 0.89                     | 7.14E-01                       | 0.33                     | 2.04E-02                       |
| mmu-miR-135a-star_st  | 1.03                     | 6.65E-01                       | 2.98                     | 1.27E-04                       |
| mmu-miR-184_st        | 1.03                     | 8.87E-01                       | 9.12                     | 2.06E-02                       |
| mmu-miR-690_st        | 1.16                     | 5.08E-01                       | 2.05                     | 2.92E-02                       |
| mmu-miR-342-5p_st     | 1.17                     | 4.96E-01                       | 2.22                     | 3.62E-03                       |

|                      |       |          |       |          |
|----------------------|-------|----------|-------|----------|
| mmu-miR-130b_st      | 1.26  | 3.50E-01 | 2.86  | 8.23E-03 |
| mmu-miR-127_st       | 1.27  | 1.18E-01 | 2.30  | 3.88E-02 |
| mmu-miR-877_st       | 1.35  | 2.12E-01 | 2.28  | 1.92E-02 |
| mmu-miR-139-5p_st    | 1.48  | 1.17E-01 | 2.12  | 2.64E-02 |
| mmu-miR-379_st       | 1.52  | 4.69E-02 | 2.91  | 8.85E-03 |
| mmu-miR-409-3p_st    | 1.70  | 1.85E-03 | 5.08  | 1.37E-02 |
| mmu-miR-382_st       | 2.08  | 3.04E-02 | 2.71  | 2.85E-02 |
| mmu-miR-146b_st      | 2.14  | 3.90E-02 | 4.27  | 4.81E-02 |
| mmu-miR-134_st       | 2.18  | 1.24E-02 | 2.57  | 3.10E-02 |
| mmu-miR-685_st       | 2.47  | 1.07E-01 | 4.92  | 5.27E-03 |
| mmu-miR-139-3p_st    | 2.53  | 1.03E-01 | 3.37  | 4.51E-02 |
| mmu-miR-21-_st       | 2.63  | 2.02E-02 | 2.35  | 1.51E-02 |
| mmu-miR-34a_st       | 2.80  | 1.58E-03 | 3.14  | 9.33E-04 |
| mmu-miR-706_st       | 2.97  | 8.08E-02 | 4.48  | 5.14E-02 |
| mmu-miR-192_st       | 3.02  | 3.74E-01 | 0.64  | 2.02E-02 |
| mmu-miR-146b-star_st | 3.10  | 8.93E-02 | 3.64  | 2.51E-02 |
| mmu-miR-487b_st      | 3.28  | 1.22E-02 | 3.32  | 2.19E-01 |
| mmu-miR-298_st       | 3.58  | 2.11E-01 | 5.38  | 4.48E-03 |
| mmu-miR-449a_st      | 4.14  | 2.75E-03 | 1.69  | 1.58E-01 |
| mmu-miR-124_st       | 35.52 | 2.44E-04 | 33.92 | 3.39E-03 |

**Table S3. miR-29 targets up-regulated in miR-29 knockdown IMR-90 cells**

| <i>Gene Symbol</i> | <i>mRna - Description</i>                                                                        | <i>p-value</i> | <i>FC (miR-29 KD/CTRL)</i> |
|--------------------|--------------------------------------------------------------------------------------------------|----------------|----------------------------|
| ABHD4              | abhydrolase domain containing 4 (ABHD4), mRNA.                                                   | 5.13E-03       | 1.14                       |
| ADAM12             | ADAM metallopeptidase domain 12 (meltrin alpha) (ADAM12), transcript variant 1, mRNA.            | 2.25E-02       | 1.66                       |
| ADAM19             | ADAM metallopeptidase domain 19 (meltrin beta) (ADAM19), transcript variant 2, mRNA.             | 1.28E-02       | 1.39                       |
| ADAMTS9            | ADAM metallopeptidase with thrombospondin type 1 motif, 9 (ADAMTS9), mRNA.                       | 1.03E-02       | 1.43                       |
| ANKRD57            | ankyrin repeat domain 57 (ANKRD57), mRNA.                                                        | 2.90E-03       | 1.12                       |
| ARNTL              | aryl hydrocarbon receptor nuclear translocator-like (ARNTL), transcript variant 1, mRNA.         | 1.16E-02       | 1.19                       |
| ATG9A              | ATG9 autophagy related 9 homolog A ( <i>S. cerevisiae</i> ) (ATG9A), transcript variant 1, mRNA. | 1.58E-03       | 1.21                       |
| BAK1               | BCL2-antagonist/killer 1 (BAK1), mRNA.                                                           | 1.49E-02       | 1.40                       |
| BMF                | Bcl2 modifying factor (BMF), transcript variant 1, mRNA.                                         | 3.79E-03       | 1.37                       |
| C17orf70           | chromosome 17 open reading frame 70 (C17orf70), mRNA.                                            | 2.61E-02       | 1.10                       |
| CASP7              | caspase 7, apoptosis-related cysteine peptidase (CASP7), transcript variant gamma, mRNA.         | 2.36E-02       | 1.36                       |
| CCDC28B            | coiled-coil domain containing 28B (CCDC28B), mRNA.                                               | 2.19E-02       | 1.13                       |
| CLDN1              | claudin 1 (CLDN1), mRNA.                                                                         | 1.30E-02       | 1.43                       |
| COL15A1            | collagen, type XV, alpha 1 (COL15A1), mRNA.                                                      | 4.76E-02       | 1.24                       |
| COL19A1            | collagen, type XIX, alpha 1 (COL19A1), mRNA.                                                     | 1.63E-02       | 1.13                       |
| COL1A1             | collagen, type I, alpha 1 (COL1A1), mRNA.                                                        | 6.74E-03       | 1.29                       |
| COL1A2             | collagen, type I, alpha 2 (COL1A2), mRNA.                                                        | 3.36E-02       | 1.15                       |
| COL3A1             | collagen, type III, alpha 1 (Ehlers-Danlos syndrome type IV, autosomal dominant) (COL3A1), mRNA. | 1.03E-02       | 1.56                       |
| COL4A1             | collagen, type IV, alpha 1 (COL4A1), mRNA.                                                       | 1.33E-02       | 1.53                       |
| COL4A2             | collagen, type IV, alpha 2 (COL4A2), mRNA.                                                       | 1.65E-02       | 1.14                       |
| COL4A5             | collagen, type IV, alpha 5 (Alport syndrome) (COL4A5), transcript variant 3, mRNA.               | 1.90E-02       | 1.48                       |
| COL5A1             | collagen, type V, alpha 1 (COL5A1), mRNA.                                                        | 1.05E-02       | 1.28                       |
| COL5A2             | collagen, type V, alpha 2 (COL5A2), mRNA.                                                        | 1.44E-02       | 1.51                       |
| COMMD2             | COMM domain containing 2 (COMMD2), mRNA.                                                         | 4.04E-02       | 1.26                       |
| CSDA               | cold shock domain protein A (CSDA), mRNA.                                                        | 2.81E-03       | 1.22                       |

|          |                                                                                                  |          |      |
|----------|--------------------------------------------------------------------------------------------------|----------|------|
| DDX3X    | DEAD (Asp-Glu-Ala-Asp) box polypeptide 3, X-linked (DDX3X), mRNA.                                | 7.89E-03 | 1.14 |
| DNMT3A   | DNA (cytosine-5-)-methyltransferase 3 alpha (DNMT3A), transcript variant 1, mRNA.                | 2.72E-02 | 1.28 |
| DYNLT1   | dynein, light chain, Tctex-type 1 (DYNLT1), mRNA.                                                | 2.81E-02 | 1.11 |
| E2F7     | E2F transcription factor 7 (E2F7), mRNA.                                                         | 6.87E-03 | 1.83 |
| EIF4E2   | eukaryotic translation initiation factor 4E family member 2 (EIF4E2), mRNA.                      | 2.68E-02 | 1.11 |
| ELF2     | E74-like factor 2 (ets domain transcription factor) (ELF2), transcript variant 1, mRNA.          | 4.27E-03 | 1.14 |
| EMP1     | epithelial membrane protein 1 (EMP1), mRNA.                                                      | 9.13E-03 | 1.34 |
| ETV4     | ets variant gene 4 (E1A enhancer binding protein, E1AF) (ETV4), transcript variant 2, mRNA.      | 4.27E-02 | 1.14 |
| FBN1     | fibrillin 1 (FBN1), mRNA.                                                                        | 2.58E-02 | 1.24 |
| FLJ14154 | hypothetical protein FLJ14154 (FLJ14154), transcript variant 2, mRNA.                            | 3.18E-02 | 1.14 |
| FOXO3    | forkhead box O3 (FOXO3), transcript variant 1, mRNA.                                             | 3.04E-02 | 1.15 |
| FSTL1    | follistatin-like 1 (FSTL1), mRNA.                                                                | 2.93E-02 | 1.22 |
| GLIS2    | GLIS family zinc finger 2 (GLIS2), mRNA.                                                         | 8.55E-04 | 1.19 |
| GPR37    | G protein-coupled receptor 37 (endothelin receptor type B-like) (GPR37), mRNA.                   | 1.41E-02 | 1.32 |
| H2AFY    | H2A histone family, member Y (H2AFY), transcript variant 2, mRNA.                                | 5.07E-03 | 1.23 |
| HBP1     | HMG-box transcription factor 1 (HBP1), mRNA.                                                     | 4.95E-03 | 1.53 |
| HIP1R    | huntingtin interacting protein 1 related (HIP1R), mRNA.                                          | 8.29E-03 | 1.17 |
| HMGCS1   | 3-hydroxy-3-methylglutaryl-Coenzyme A synthase 1 (soluble) (HMGCS1), transcript variant 1, mRNA. | 8.45E-03 | 1.30 |
| IL1RAPL1 | interleukin 1 receptor accessory protein-like 1 (IL1RAPL1), mRNA.                                | 1.70E-02 | 1.51 |
| INSIG1   | insulin induced gene 1 (INSIG1), transcript variant 2, mRNA.                                     | 1.90E-03 | 1.55 |
| ITGA11   | integrin, alpha 11 (ITGA11), mRNA.                                                               | 1.03E-02 | 1.38 |
| ITGA6    | integrin, alpha 6 (ITGA6), transcript variant 2, mRNA.                                           | 2.56E-02 | 1.24 |
| JARID1B  | jumonji, AT rich interactive domain 1B (JARID1B), mRNA.                                          | 2.99E-02 | 1.36 |
| JARID2   | jumonji, AT rich interactive domain 2 (JARID2), mRNA.                                            | 3.68E-02 | 1.33 |
| JMJD2B   | jumonji domain containing 2B (JMJD2B), mRNA.                                                     | 4.61E-02 | 1.10 |
| KBTBD8   | kelch repeat and BTB (POZ) domain containing 8 (KBTBD8), mRNA.                                   | 3.04E-03 | 1.11 |
| KIRREL   | kin of IRRE like (Drosophila) (KIRREL), mRNA.                                                    | 3.36E-02 | 1.12 |

|         |                                                                                                                              |          |      |
|---------|------------------------------------------------------------------------------------------------------------------------------|----------|------|
| KLF4    | Kruppel-like factor 4 (gut) (KLF4), mRNA.                                                                                    | 9.59E-03 | 1.35 |
| KLHDC3  | kelch domain containing 3 (KLHDC3), mRNA.                                                                                    | 2.56E-03 | 1.65 |
| LAMC1   | laminin, gamma 1 (formerly LAMB2) (LAMC1), mRNA.                                                                             | 3.98E-02 | 1.27 |
| LEP     | leptin (obesity homolog, mouse) (LEP), mRNA.                                                                                 | 6.94E-03 | 1.16 |
| LEPRE1  | leucine proline-enriched proteoglycan (leprecan) 1 (LEPRE1), mRNA.                                                           | 4.93E-03 | 1.31 |
| LOXL2   | lysyl oxidase-like 2 (LOXL2), mRNA.                                                                                          | 5.02E-03 | 1.23 |
| LSM11   | LSM11, U7 small nuclear RNA associated (LSM11), mRNA.                                                                        | 3.83E-03 | 1.20 |
| MAFB    | v-maf musculoaponeurotic fibrosarcoma oncogene homolog B (avian) (MAFB), mRNA.                                               | 3.50E-02 | 1.20 |
| MAZ     | MYC-associated zinc finger protein (purine-binding transcription factor) (MAZ), transcript variant 2, mRNA.                  | 4.39E-03 | 1.49 |
| MEX3B   | ring finger and KH domain containing 3 (RKHD3), mRNA.                                                                        | 1.11E-02 | 1.19 |
| MGAT4B  | mannosyl (alpha-1,3-)-glycoprotein beta-1,4-N-acetylglucosaminyltransferase, isozyme B (MGAT4B), transcript variant 2, mRNA. | 4.64E-03 | 1.19 |
| MMP2    | matrix metalloproteinase 2 (gelatinase A, 72kDa gelatinase, 72kDa type IV collagenase) (MMP2), mRNA.                         | 9.78E-04 | 1.33 |
| NFATC4  | nuclear factor of activated T-cells, cytoplasmic, calcineurin-dependent 4 (NFATC4), mRNA.                                    | 4.20E-02 | 1.18 |
| NID1    | nidogen 1 (NID1), mRNA.                                                                                                      | 1.20E-02 | 2.05 |
| NKIRAS2 | NFKB inhibitor interacting Ras-like 2 (NKIRAS2), transcript variant 1, mRNA.                                                 | 2.55E-02 | 1.19 |
| OSBPL10 | oxysterol binding protein-like 10 (OSBPL10), mRNA.                                                                           | 4.15E-02 | 1.16 |
| OSBPL1A | oxysterol binding protein-like 1A (OSBPL1A), transcript variant OSBPL1B, mRNA.                                               | 2.79E-02 | 1.18 |
| PAG1    | phosphoprotein associated with glycosphingolipid microdomains 1 (PAG1), mRNA.                                                | 1.12E-03 | 1.62 |
| PALM    | paralemmin (PALM), transcript variant 1, mRNA.                                                                               | 3.39E-02 | 1.14 |
| PDGFRB  | platelet-derived growth factor receptor, beta polypeptide (PDGFRB), mRNA.                                                    | 2.24E-04 | 1.22 |
| PITPNM2 | phosphatidylinositol transfer protein, membrane-associated 2 (PITPNM2), mRNA.                                                | 3.79E-02 | 1.23 |
| PPIC    | peptidylprolyl isomerase C (cyclophilin C) (PPIC), mRNA.                                                                     | 1.86E-02 | 1.53 |
| PTEN    | phosphatase and tensin homolog (mutated in multiple advanced cancers 1) (PTEN), mRNA.                                        | 4.26E-02 | 1.20 |
| PXDN    | peroxidasin homolog (Drosophila) (PXDN), mRNA.                                                                               | 1.13E-03 | 1.35 |
| RCC2    | regulator of chromosome condensation 2 (RCC2), mRNA.                                                                         | 6.42E-03 | 1.57 |
| RHOBTB1 | Rho-related BTB domain containing 1 (RHOBTB1), transcript variant 1, mRNA.                                                   | 2.81E-02 | 1.42 |
| RIT1    | Ras-like without CAAX 1 (RIT1), mRNA.                                                                                        | 4.84E-02 | 1.29 |

|          |                                                                                                                       |          |      |
|----------|-----------------------------------------------------------------------------------------------------------------------|----------|------|
| SERPINH1 | serpin peptidase inhibitor, clade H (heat shock protein 47), member 1, (collagen binding protein 1) (SERPINH1), mRNA. | 5.49E-03 | 1.44 |
| SESTD1   | SEC14 and spectrin domains 1 (SESTD1), mRNA.                                                                          | 2.39E-02 | 1.46 |
| SETDB1   | SET domain, bifurcated 1 (SETDB1), mRNA.                                                                              | 6.53E-03 | 1.11 |
| SH3PXD2B | SH3 and PX domains 2B (SH3PXD2B), mRNA.                                                                               | 2.05E-02 | 1.11 |
| SLC16A14 | solute carrier family 16, member 14 (monocarboxylic acid transporter 14) (SLC16A14), mRNA.                            | 3.18E-02 | 1.22 |
| SLC2A3   | solute carrier family 2 (facilitated glucose transporter), member 3 (SLC2A3), mRNA.                                   | 8.71E-04 | 1.24 |
| SNRK     | SNF related kinase (SNRK), mRNA.                                                                                      | 2.58E-02 | 1.21 |
| SPARC    | secreted protein, acidic, cysteine-rich (osteonectin) (SPARC), mRNA.                                                  | 8.56E-03 | 1.32 |
| SPNS1    | spinster homolog 1 (Drosophila) (SPNS1), mRNA.                                                                        | 3.56E-03 | 1.41 |
| TAF11    | TAF11 RNA polymerase II, TATA box binding protein (TBP)-associated factor, 28kDa (TAF11), mRNA.                       | 9.53E-03 | 1.29 |
| TMEM183A | transmembrane protein 183A (TMEM183A), mRNA.                                                                          | 3.19E-03 | 1.24 |
| TMEM183B | transmembrane protein 183B (TMEM183B), mRNA.                                                                          | 5.47E-03 | 1.20 |
| TP53INP1 | tumor protein p53 inducible nuclear protein 1 (TP53INP1), mRNA.                                                       | 2.94E-02 | 1.16 |
| TRAF4    | TNF receptor-associated factor 4 (TRAF4), mRNA.                                                                       | 4.26E-04 | 1.21 |
| TRIB2    | tribbles homolog 2 (Drosophila) (TRIB2), mRNA.                                                                        | 1.08E-02 | 1.44 |
| TRIM9    | tripartite motif-containing 9 (TRIM9), transcript variant 2, mRNA.                                                    | 4.37E-02 | 1.13 |
| VASH1    | vasohibin 1 (VASH1), mRNA.                                                                                            | 1.88E-02 | 1.20 |
| WDR40B   | WD repeat domain 40B (WDR40B), mRNA.                                                                                  | 1.97E-02 | 1.27 |
| YPEL2    | yippee-like 2 (Drosophila) (YPEL2), mRNA.                                                                             | 1.45E-02 | 1.32 |
| ZBTB34   | zinc finger and BTB domain containing 34 (ZBTB34), mRNA.                                                              | 4.12E-02 | 1.17 |
| ZFP36L1  | zinc finger protein 36, C3H type-like 1 (ZFP36L1), mRNA.                                                              | 4.75E-03 | 1.11 |
| ZMIZ1    | zinc finger, MIZ-type containing 1 (ZMIZ1), mRNA.                                                                     | 3.36E-02 | 1.21 |
| ZNF641   | zinc finger protein 641 (ZNF641), mRNA.                                                                               | 1.23E-02 | 1.12 |
